# Supplementary material for: Phytochemical Content and Pharma-Nutrition Study on Eleutherococcus senticosus Fruits Intractum
Source: PubMed Central journal article supplement (PMC5098108; doi:10.1155/2016/9270691), 2016-10-24
Supplement: 9270691.f1.pdf [file 9270691.f1.pdf]

## TABLES

**Table S1:** LC-ESI-MS/MS analytical results of phenolic acids. Compounds confirmed by comparison with authentic standards.

| Compound                     | Peak no. | T <sub>R</sub><br>(min) | [M-H] <sup>-</sup> | Fragment ions | Collision energy<br>(eV) |
|------------------------------|----------|-------------------------|--------------------|---------------|--------------------------|
| <b>Galic acid</b>            | 1        | 1.10                    | 168.7              | 124.9         | - 14                     |
|                              |          |                         |                    | 78.9          | - 36                     |
| <b>Protocatechuic acid</b>   | 2        | 2.25                    | 152.9              | 107.8         | - 38                     |
|                              |          |                         |                    | 80.9          | - 26                     |
| <b>Gentisic acid</b>         | 3        | 4.15                    | 152.8              | 107.9         | - 36                     |
|                              |          |                         |                    | 81            | - 30                     |
| <b>4-OH-benzoic acid</b>     | 4        | 4.30                    | 136.8              | 92.9          | - 18                     |
| <b>3-OH-benzoic acid</b>     | 5        | 5.40                    | 136.8              | 92.9          | - 18                     |
|                              |          |                         |                    | 75            | - 48                     |
| <b>Vanillic acid</b>         | 6        | 5.65                    | 166.8              | 107.9         | - 18                     |
|                              |          |                         |                    | 123           | - 12                     |
| <b>trans-Caffeic acid</b>    | 7        | 5.90                    | 178.7              | 134.9         | - 16                     |
|                              |          |                         |                    | 88.9          | - 46                     |
| <b>cis-Caffeic acid</b>      | 8        | 6.20                    | 178.7              | 134.9         | - 16                     |
|                              |          |                         |                    | 88.9          | - 46                     |
| <b>Syringic acid</b>         | 9        | 6.80                    | 196.9              | 181.9         | - 12                     |
|                              |          |                         |                    | 122.8         | - 24                     |
| <b>trans-p-Coumaric acid</b> | 10       | 7.70                    | 162.7              | 119           | - 14                     |
|                              |          |                         |                    | 93            | - 44                     |
| <b>cis-p-Coumaric acid</b>   | 11       | 7.81                    | 162.7              | 119           | - 14                     |
|                              |          |                         |                    | 93            | - 44                     |
| <b>trans-Ferulic acid</b>    | 12       | 8.25                    | 192.8              | 177.9         | - 12                     |
|                              |          |                         |                    | 133.9         | - 16                     |
| <b>Veratric acid</b>         | 13       | 8.30                    | 180.7              | 136.9         | - 12                     |
|                              |          |                         |                    | 121.9         | - 18                     |
| <b>Salicylic acid</b>        | 14       | 8.38                    | 136.8              | 93            | - 16                     |
|                              |          |                         |                    | 75            | - 48                     |
| <b>3-OH-cinnamic acid</b>    | 15       | 8.40                    | 162.8              | 119           | - 14                     |
|                              |          |                         |                    | 91            | - 36                     |
| <b>cis-Ferulic acid</b>      | 16       | 8.40                    | 192.8              | 177.9         | - 12                     |
|                              |          |                         |                    | 133.9         | - 16                     |
| <b>trans-Sinapic acid</b>    | 17       | 8.42                    | 222.8              | 148.9         | - 20                     |
|                              |          |                         |                    | 121           | - 36                     |
| <b>cis-Sinapic acid</b>      | 18       | 8.58                    | 222.8              | 148.9         | - 20                     |
|                              |          |                         |                    | 121           | - 36                     |

**Table S2:** Analytical parameters of LC-MS/MS quantitative method; data for calibration curves, limit of detection (LOD) and limit of quantification (LOQ) values for each analyzed compound.

| Compound                      | LOD<br>[ng mL <sup>-1</sup> ] | LOQ<br>[ng mL <sup>-1</sup> ] | Calibration curve   | $r^2$  | Linearity range<br>[ng mL <sup>-1</sup> ] |
|-------------------------------|-------------------------------|-------------------------------|---------------------|--------|-------------------------------------------|
| Gallic acid                   | 25                            | 50                            | $y = 218x - 201$    | 0.9995 | 50-5000                                   |
| Protocatechuic acid           | 10                            | 25                            | $y = 86.2x + 1260$  | 0.9999 | 50-12500                                  |
| Gentisic acid                 | 5                             | 15                            | $y = 851x + 6880$   | 0.9994 | 15-5000                                   |
| 4-OH-benzoic acid             | 20                            | 50                            | $y = 1480x + 6490$  | 0.9998 | 50-2000                                   |
| 3-OH-benzoic acid             | 20                            | 40                            | $y = 415x + 11400$  | 0.9999 | 50-2000                                   |
| Vanilic acid                  | 25                            | 50                            | $y = 59.4x + 1740$  | 0.9994 | 50-5000                                   |
| <i>trans</i> -Caffeic acid    | 10                            | 25                            | $y = 1100x + 4040$  | 0.9994 | 25-2500                                   |
| <i>cis</i> -Caffeic acid      | 10                            | 25                            | $y = 1100x + 4040$  | 0.9994 | 25-2500                                   |
| Syringic acid                 | 25                            | 50                            | $y = 75.4x + 4230$  | 0.9996 | 50-10000                                  |
| <i>trans-p</i> -Coumaric acid | 10                            | 25                            | $y = 888x + 403$    | 0.9999 | 25-2500                                   |
| <i>cis-p</i> -Coumaric acid   | 10                            | 25                            | $y = 888x + 403$    | 0.9999 | 25-2500                                   |
| <i>trans</i> -Ferulic acid    | 10                            | 25                            | $y = 411x - 1840$   | 0.9994 | 40-2000                                   |
| Veratric acid                 | 100                           | 200                           | $y = 102x + 2470$   | 0.9996 | 200-5000                                  |
| Salicylic acid                | 10                            | 30                            | $y = 2060x + 14300$ | 0.9999 | 30-1000                                   |
| 3-OH-cinnamic acid            | 10                            | 25                            | $y = 569x + 4280$   | 0.9997 | 50-2500                                   |
| <i>cis</i> -Ferulic acid      | 10                            | 25                            | $y = 411x - 1840$   | 0.9994 | 40-2000                                   |
| <i>trans</i> -Sinapic acid    | 8                             | 20                            | $y = 319x - 33.3$   | 0.9997 | 20-2500                                   |
| <i>cis</i> -Sinapic acid      | 8                             | 20                            | $y = 319x - 33.3$   | 0.9997 | 20-2500                                   |
